# Supplementary material for: Unidirectional growth of organic single crystals of naphthalene, anthracene and pyrene by isothermal expansion of supercritical CO2
Source: Royal Society of Chemistry journal article supplement (doi:10.1039/d0ra03706k), 2020-01-01
Supplement: d0ra03706k1.pdf [file d0ra03706k1.pdf]

## Supporting Information

### Unidirectional growth of organic single crystals of naphthalene, anthracene and pyrene by isothermal expansion of supercritical CO<sub>2</sub>

Anant Sarve<sup>‡</sup>, Jimil George<sup>†</sup>, Santosh Agrawal<sup>¶</sup>, Raksh Vir Jasra<sup>¶</sup> and Pradip Munshi<sup>¶\*</sup>

<sup>‡</sup> Department of Chemical Engineering, Sardar Vallabhbhai National Institute of Technology, Surat, 395007, India.

<sup>†</sup> Department of Chemistry, Cochin University of Science and Technology, Cochin, Kerala 682022, India.

<sup>¶</sup> Research Centre, Reliance Technology Group, Reliance Industries Limited, Vadodara, Gujarat, India, 391346, India.

| Content                                                                                                                                                    | Page |
|------------------------------------------------------------------------------------------------------------------------------------------------------------|------|
| Index                                                                                                                                                      | 1    |
| Measurement of depressurized CO <sub>2</sub> .                                                                                                             | 2    |
| Determination of rate of crystallization                                                                                                                   | 2    |
| Table S1: Recycle test of anthracene crystallization.                                                                                                      | 3    |
| Fig. S1. Pneumatic trough gas collection for measurement of depressurized CO <sub>2</sub> gas collected to crystallizer vent.                              | 3    |
| Fig S2. a) SEM Image, b) XRD of naphthalene crystal. CO <sub>2</sub> 120 bar, temp. 45°C, depressurization 10 mL per min, FWHM for 2θ 13.96° [001] 0.0856. | 4    |
| Fig. S3. a) SEM Image, b) XRD of anthracene crystal. CO <sub>2</sub> 120 bar, temp. 45°C, depressurization 50 mL per min.                                  | 4    |

## 1. Measurement of depressurized CO<sub>2</sub>.

Depressurized CO<sub>2</sub> was measured through pneumatic trough as described in Fig S2. The outlet of crystallizer vent was connected to the inlet shown by “→”. A flat container of 5 L (1) was taken and filled with 2.5 L water. A graduated cylinder (2) (diameter 20 cm, height 10 cm) was completely filled with water and placed inverted into 1. Incoming CO<sub>2</sub> from crystallizer vessel as shown through arrow (→) was passed through the tube (3) that is inserted under water into 2 as shown in Fig S2. Collected CO<sub>2</sub> (4) was measured with respect to time as per the pre-calibrated water level.

## 2. Determination of rate of crystallization

The rate of crystallization was calculated as described below.

Volume of crystallizer  $V_c = 100$  mL

Working Pressure  $P_w = 120$  bar = 118.43 atm

Depressurization pressure  $P_d = 1$  atm

Volume of CO<sub>2</sub> in 1 atm,  $V_{atm}$  was obtained from eq 1.

Depressurization rate (mL/min) =  $R_d$

Time required for complete depressurization (t) in sec was obtained from eq 2.

Crystal length measured in mm = l

Crystal length in meter  $l_c = \frac{l}{1000}$

Growth rate R in m.s-1 was obtained from eq 3.

$$V_{atm} = \frac{P_w V_c}{P_d} \quad (1)$$

$$t = \frac{V_{atm}}{R_d} \times 60 \quad (2)$$

$$R = \frac{l_c}{t} \quad (3)$$

For example, Growth rate of anthracene ((Table 2, in present work) in  $\text{m.s}^{-1}$

$$R_{anthracene} = \frac{l_c}{t} = \frac{l_c R_d}{V_{atm} \cdot 60} = \frac{l_c R_d P_d}{P_w V_c \cdot 60000} = \frac{2 \times 10 \times 1}{118.43 \times 100 \times 60000} = 2.8 \times 10^{-8}$$

Table S1: Recycle test of anthracene crystallization.<sup>a)</sup>

| Recycle Nos. | $W_0$ (g) | $W_c$ (g) | $W_p$ (g) | $W_a$ (g) | % Yield<br>[( $W_c/W_0$ ) x 100] |
|--------------|-----------|-----------|-----------|-----------|----------------------------------|
| 1            | 2         | 1.35      | 0.52      | 1.48      | 67.09                            |
| 2            | 2         | 1.30      | 0.54      | 1.46      | 65.0                             |
| 3            | 2         | 1.33      | 0.43      | --        | 66.5                             |

a)  $\text{CO}_2$  120 bar; temperature 45 °C; depressurization 10 mL per min.  $W_0$  weight taken;  $W_c$  weight of crystals obtained (g)  $W_p$  weight of powder after cycle.

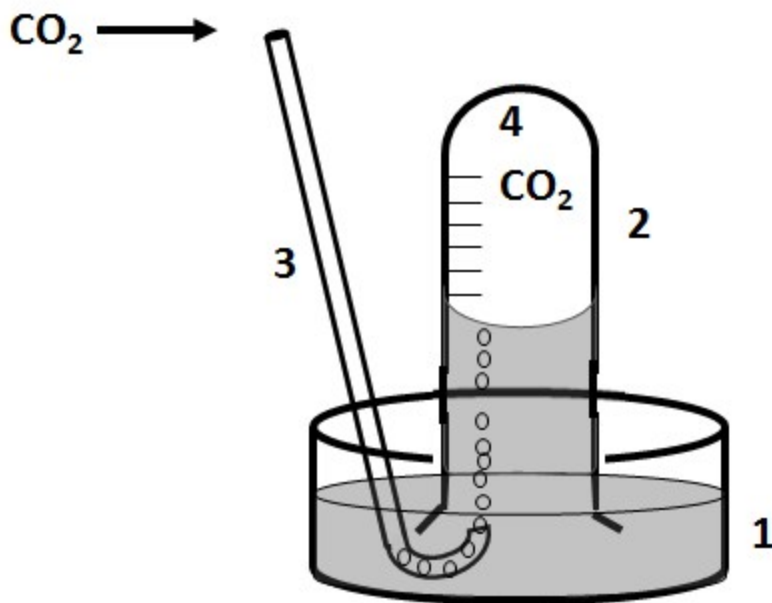

**Fig S1.** Pneumatic trough gas collection for measurement of depressurized CO<sub>2</sub> gas collected to crystallizer vent.

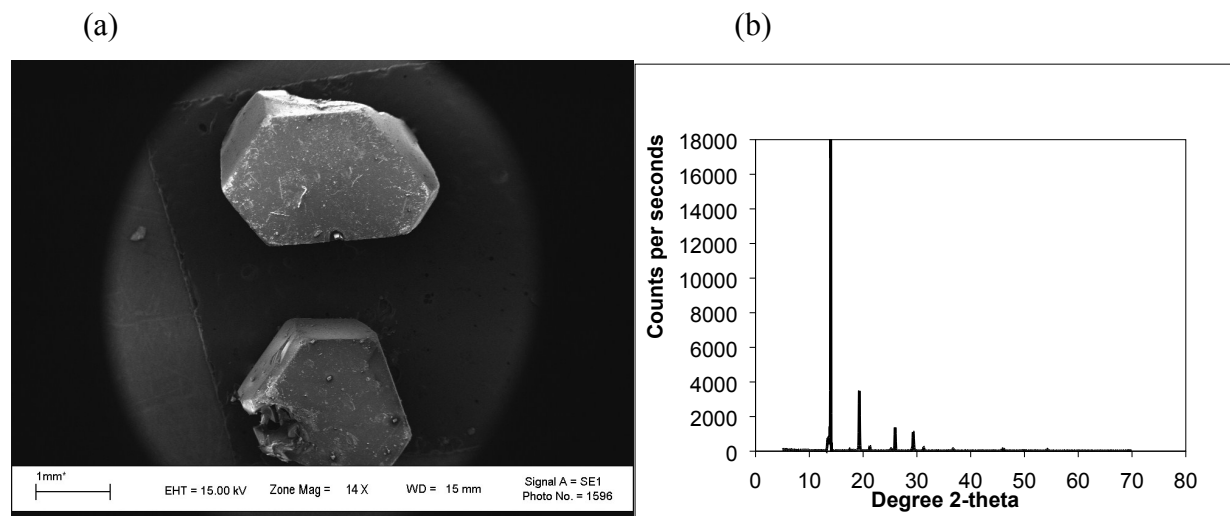

**Fig. S2.** a) SEM Image, b) XRD of naphthalene crystal. CO<sub>2</sub> 120 bar, temp. 45°C, depressurization 10 mL per min, FWHM for 2θ 13.96° [001] 0.0856.

(a)

(b)

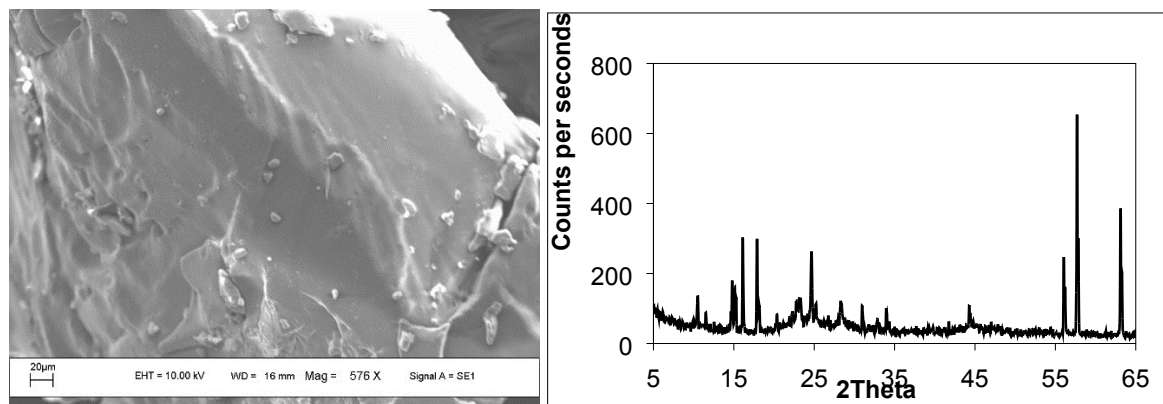

**Fig. S3.** a) SEM Image, b) XRD of anthracene crystal. CO<sub>2</sub> 120 bar, temp. 45°C, depressurization rate 50 mL per min.
